# Supplementary material for: Discerning the Location and Nature of Coke Deposition from Surface to Bulk of Spent Zeolite Catalysts
Source: PubMed Central journal article supplement (PMC5120296; doi:10.1038/srep37586), 2016-11-23
Supplement: srep37586-s1.pdf [file srep37586-s1.pdf]

## SUPPLEMENTARY INFORMATION

# **Discerning the Location and Nature of Coke Deposition from Surface to Bulk of Spent Zeolite Catalysts**

Arun Devaraj <sup>a,\*</sup>, Murugesan Vijayakumar <sup>b</sup>, Jie Bao <sup>b</sup>, Mond F. Guo <sup>b</sup>, Mirosław A. Derewinski <sup>a</sup>, Zhijie Xu <sup>a</sup> Michel J. Gray <sup>b</sup>, Sebastian Prodinge <sup>a</sup>, Karthikeyan K. Ramasamy <sup>b,\*</sup>

<sup>a</sup> Physical and Computational Sciences Directorate, Pacific Northwest National Laboratory Richland, Washington 99354, USA

<sup>b</sup> Energy and Environment Directorate, Pacific Northwest National Laboratory, Richland, WA 99354, USA

Corresponding authors: [arun.devaraj@pnnl.gov](mailto:arun.devaraj@pnnl.gov), [karthi@pnnl.gov](mailto:karthi@pnnl.gov)

## SUPPLEMENTARY INFORMATION

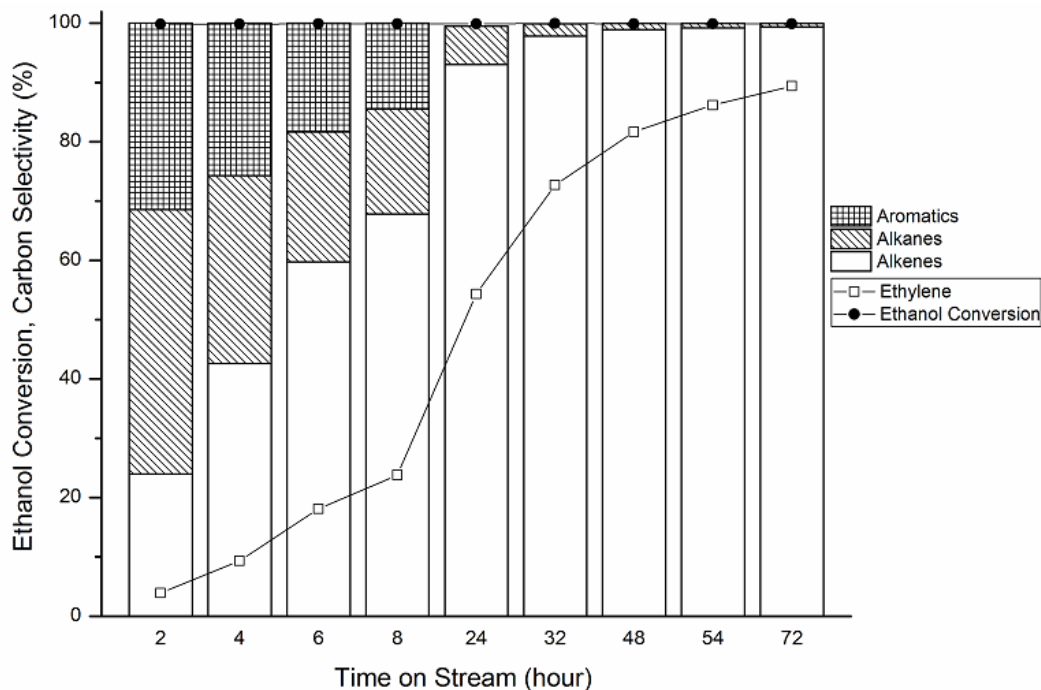

Supplementary Figure 1: Ethanol conversion and the product carbon selectivity over the HZSM-5 catalyst at 350°C, atmospheric pressure and 2.9h<sup>-1</sup> weight hourly space velocity.

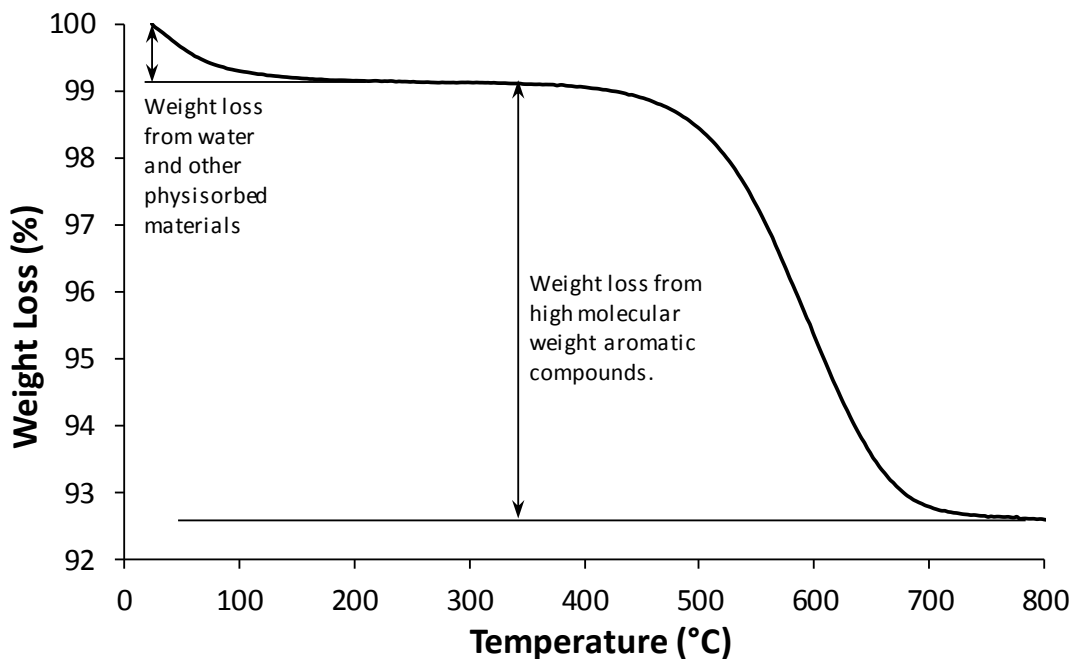

Supplementary Figure 2: Spent catalyst weight loss from the TPO-TGA using 5vol% O<sub>2</sub> in N<sub>2</sub> carrier gas with 5°C/min ramp rate to 800°C from room temperature.

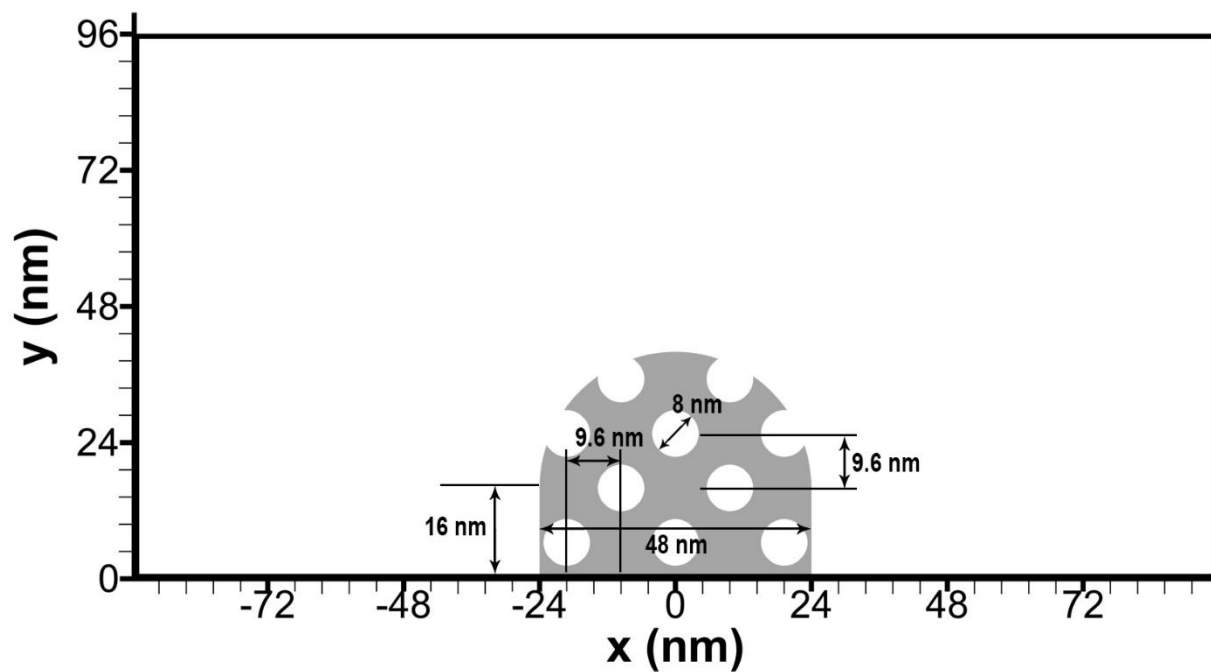

Supplementary Figure 3: The APT simulation domain and the specimen setup.

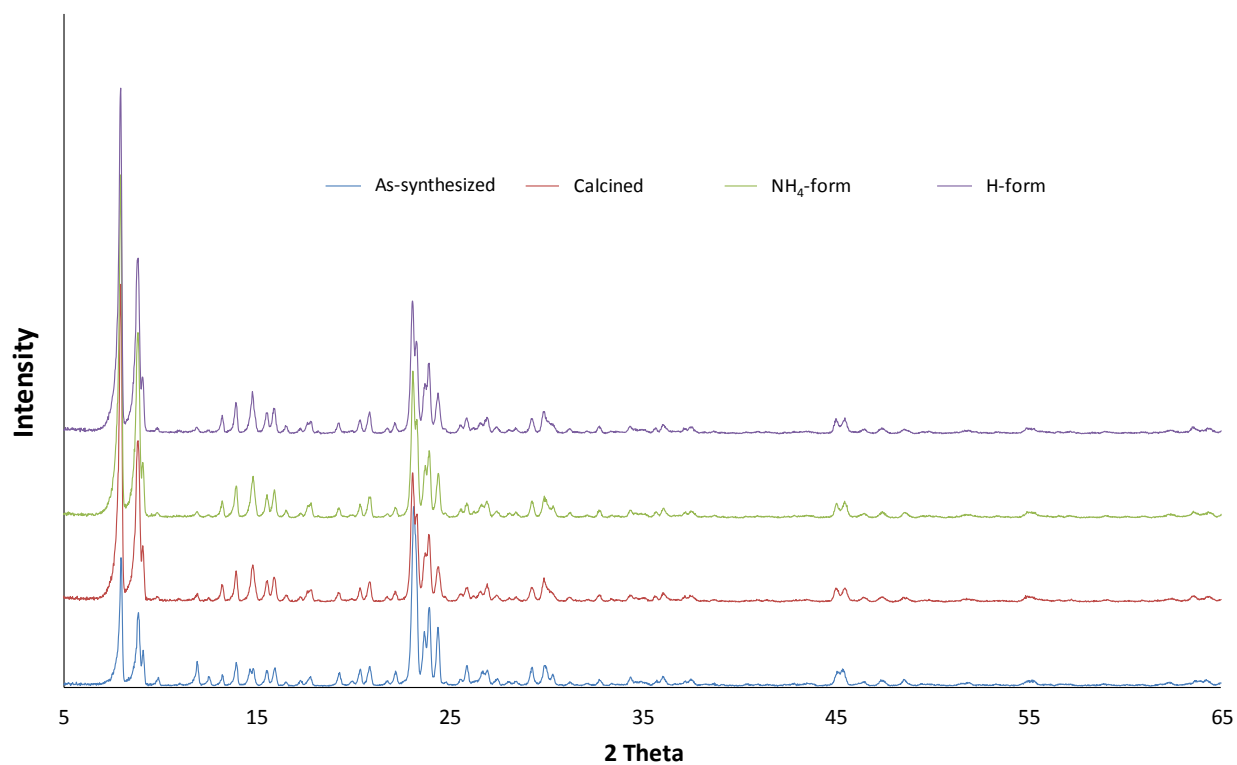

Supplementary Figure 4: XRD profile of the zeolite material tested in the form of as-synthesized, calcined, NH<sub>4</sub> form, and H-form.

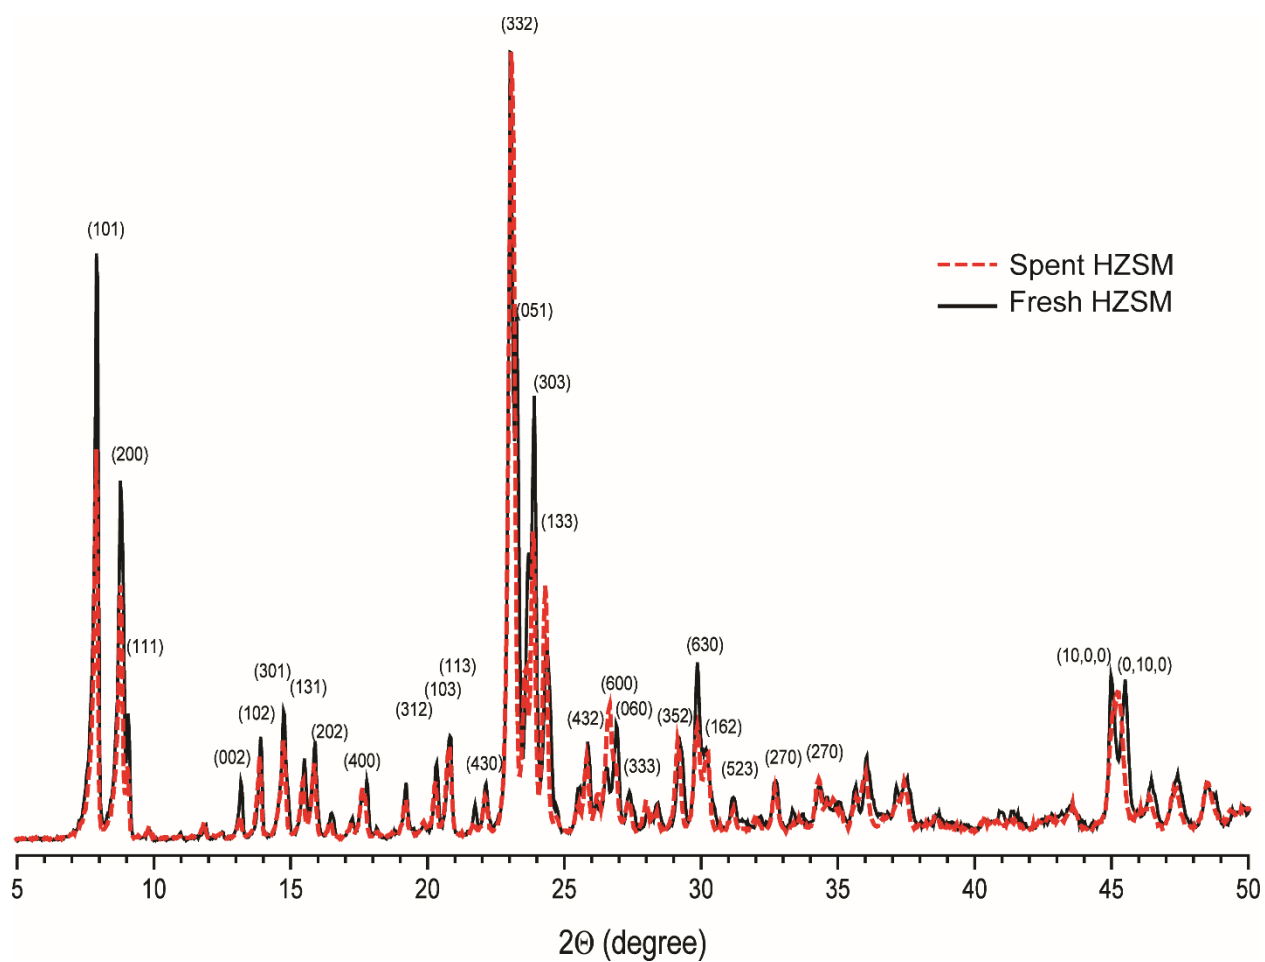

Supplementary figure 5: XRD spectra of fresh and spent HZSM-5 showing that crystallinity of the ZSM-5 did not change due to coking.

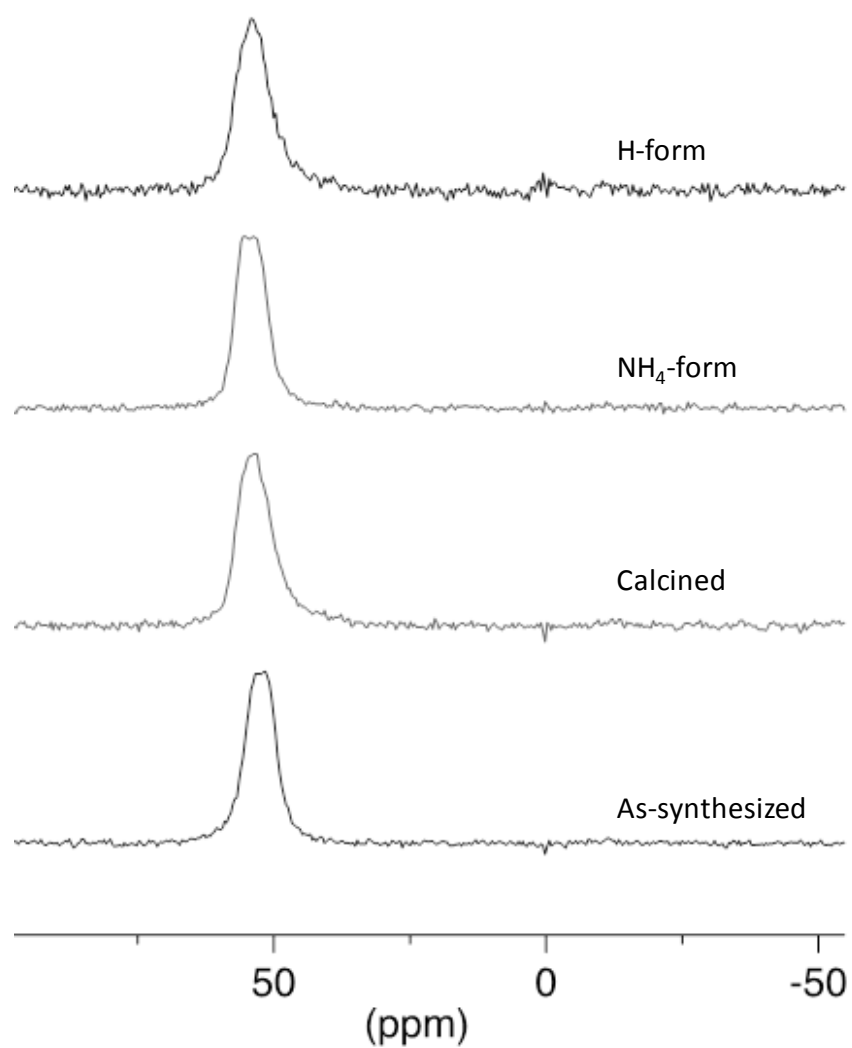

Supplementary Figure 6:  $^{27}\text{Al}$  MAS NMR spectra of the zeolite material tested in the form of as-synthesized, calcined, NH<sub>4</sub> form, and H-form.
